# Supplementary material
Source: PubMed Central journal article supplement (PMC5728099)
Supplement: ba008219-suppl1.pdf [file ba008219-suppl1.pdf]

**Supplemental Table 1.** Characteristics of the entire analytic sample and by genotype severity, excluding those with a history of stroke (n=11).

|                                   | Entire analytic sample<br>Mean (SD)*<br>n=77 | “Severe” genotype<br>Mean (SD)*<br>n=47 | “Moderate” genotype<br>Mean (SD)*<br>n=30 | P-value† |
|-----------------------------------|----------------------------------------------|-----------------------------------------|-------------------------------------------|----------|
| <b>Age</b>                        | 36.1 (11.7)                                  | 33.1 (10.0)                             | 40.8 (13.0)                               | 0.01     |
| <b>Male sex*</b>                  | 27 (35.1%)                                   | 16 (34.0%)                              | 11 (36.7%)                                | 0.87     |
| <b>Education</b>                  | 13.1 (1.7)                                   | 13.0 (1.7)                              | 13.2 (1.7)                                | 0.76     |
| <b>Mild Cognitive Impairment*</b> | 12 (15.6%)                                   | 10 (21.3%)                              | 2 (6.7%)                                  | 0.28     |
| <b>DSST T-score</b>               | 47.9 (10.9)                                  | 45.1 (10.6)                             | 52.1 (10.2)                               | 0.01     |
| <b>O<sup>2</sup> Saturation</b>   | 97.8 (1.8)                                   | 97.6 (1.8)                              | 98.0 (1.7)                                | 0.31     |
| <b>WBC count</b>                  | 9.4 (3.3)                                    | 9.6 (3.1)                               | 9.1 (3.7)                                 | 0.90     |
| <b>Hemoglobin</b>                 | 10.1 (1.9)                                   | 9.2 (1.6)                               | 11.5 (1.6)                                | <0.0001  |
| <b>Platelet count</b>             | 311.8 (171.9)                                | 345.8 (193.5)                           | 259.7 (117.0)                             | 0.22     |
| <b>Reticulocytes</b>              | 1.5 (3.5)                                    | 1.7 (4.1)                               | 1.2 (2.0)                                 | 0.49     |
| <b>LDH (IU/L)</b>                 | 299.5 (149.0)                                | 314.7 (145.9)                           | 274.1 (153.4)                             | 0.40     |
| <b>Ferritin (ng/mL)</b>           | 716.2 (1273.4)                               | 877.2 (1356.4)                          | 431.4 (1077.8)                            | 0.10     |
| <b>Creatinine (mg/dL)</b>         | 0.7 (0.2)                                    | 0.7 (0.3)                               | 0.8 (0.2)                                 | 0.97     |
| <b>SBP (mm/Hg)</b>                | 114.2 (13.6)                                 | 112.0 (13.9)                            | 117.4 (12.6)                              | 0.27     |
| <b>DBP (mm/Hg)</b>                | 70.9 (8.9)                                   | 69.5 (8.8)                              | 72.9 (9.8)                                | 0.14     |
| <b>MAP (mm/Hg)</b>                | 85.3 (9.4)                                   | 83.6 (8.8)                              | 87.7 (9.7)                                | 0.14     |
| <b>Hydroxyurea use*</b>           | 38 (49.4%)                                   | 29 (61.7%)                              | 9 (30.0%)                                 | 0.01     |
| <b>Opiate use*</b>                | 24 (31.2%)                                   | 15 (31.9%)                              | 9 (30.0%)                                 | 0.98     |
| <b>Transfusion history*</b>       | 16 (20.8%)                                   | 11 (23.4%)                              | 5 (17.2%)                                 | 0.63     |
| <b>Stroke history*</b>            | 0 (0%)                                       | 0 (0%)                                  | 0 (0%)                                    | N/A      |
| <b>SCI history</b>                | 4 (5.2%)                                     | 3 (6.4%)                                | 1 (3.3%)                                  | 0.65     |

DSST, digit symbol substitution test; WBC, white blood cell; LDH, lactate dehydrogenase; SBP, systolic blood pressure; DBP, diastolic blood pressure; MAP, mean arterial pressure; SCI=silent cerebral infarct  
\* N(%) are reported.

† Age-adjusted p-value calculated with linear regression for continuous variables and logistic regression for categorical variables all variables; the models with age and standardized DSST T-score were unadjusted.

**Supplemental Table 2.** Association of genotype and DSST T-score, adjusted by factors that were associated with genotype severity, excluding participants with a history of stroke (n=11).

| <b>Covariates (X)</b>  | <b>Model adjusted for X</b>             |  | <b>VIF**</b> |
|------------------------|-----------------------------------------|--|--------------|
|                        | <b><math>\beta</math> (SE); p-value</b> |  |              |
| <b>Unadjusted</b>      | -7.04 (2.44); 0.01                      |  | 1.00         |
| <b>Hemoglobin</b>      | -6.27 (3.01); 0.05                      |  | 1.51         |
| <b>Ferritin</b>        | -7.49 (2.49); 0.01                      |  | 1.03         |
| <b>DBP</b>             | -7.36 (2.56); 0.01                      |  | 1.04         |
| <b>MAP</b>             | -7.47 (2.57); 0.004                     |  | 1.05         |
| <b>Hydroxyurea use</b> | -7.04 (2.58); 0.01                      |  | 1.11         |
| <b>Fully adjusted*</b> | -7.70 (3.57); 0.03                      |  | 1.77         |

DSST, digit symbol substitution test; DBP, diastolic blood pressure; MAP, mean arterial pressure  
 The  $\beta$ s(SEs) and p values are for the variable “genotype” (severe vs. moderate-severe), for the model of “genotype” predicting standardized DSST score, adjusted for the covariate reported in the corresponding row of the table.

\*Fully adjusted model includes genotype, hemoglobin, ferritin, DBP, MAP, hydroxyurea use and stroke/SCI history as predictors. \*\*VIF=variance inflation factor of genotype in unadjusted and adjusted models.

**Supplemental Table 3.** Associations of genotype and DSST T-score, individually adjusted for covariates that were associated with genotype severity, among 72 participants with complete data on all covariates.

| <b>Covariates (X)</b>  | <b>Model adjusted for X</b>                        | <b>VIF**</b> |
|------------------------|----------------------------------------------------|--------------|
|                        | <b><math>\beta</math> (p-value); R<sup>2</sup></b> |              |
| <b>Unadjusted</b>      | -7.94 (2.88); 0.01                                 | 1.00         |
| <b>Hemoglobin</b>      | -7.44 (3.76); 0.05                                 | 1.68         |
| <b>Ferritin</b>        | -7.44 (3.03); 0.02                                 | 1.08         |
| <b>DBP</b>             | -8.60 (3.00); 0.01                                 | 1.08         |
| <b>MAP</b>             | -8.52 (3.01); 0.01                                 | 1.09         |
| <b>Hydroxyurea use</b> | -8.18 (3.08); 0.01                                 | 1.13         |
| <b>Fully adjusted*</b> | -8.15 (4.11); 0.05                                 | 1.93         |

DSST, digit symbol substitution test; DBP, diastolic blood pressure; MAP, mean arterial pressure  
The  $\beta$ s(SEs) and p values are for the variable “genotype” (severe vs. moderate-severe), for the model of “genotype” predicting standardized DSST score, adjusted for the covariate reported in the corresponding row of the table.

\*Fully adjusted model includes genotype, hemoglobin, ferritin, DBP, MAP, hydroxyurea use and stroke/SCI history as predictors. \*\*VIF=variance inflation factor of genotype in unadjusted and adjusted models.
